# Supplementary material for: Complicated synergistic effects between metal–π interaction and halogen bonding involving MCCX
Source: Royal Society of Chemistry journal article supplement (doi:10.1039/c5ra22968e), 2015-01-01

## Supporting information

Table S1 Second-order perturbation energy ( $E^2$ , kcal/mol) in the dyads at the HF/aug-cc-pVTZ(PP) level.

| metal- $\pi$  | $E^2(1)$ | $E^2(2)$ | XB           | $E^2(3)$ |
|---------------|----------|----------|--------------|----------|
| FCCF...CuCCCl | 236.62   | 74.72    | CuCCCl...NCH | 0.92     |
| FCCF...CuCCBr | 237.68   | 74.52    | CuCCBr...NCH | 2.28     |
| FCCF...CuCCl  | 236.60   | 74.33    | CuCCl...NCH  | 4.14     |
| FCCF...AgCCCl | 183.31   | 47.86    | AgCCCl...NCH | 0.90     |
| FCCF...AgCCBr | 181.97   | 47.63    | AgCCBr...NCH | 2.22     |
| FCCF...AgCCl  | 179.50   | 47.48    | AgCCl...NCH  | 4.14     |
| FCCF...AuCCCl | 408.93   | 98.11    | AuCCCl...NCH | 1.10     |
| FCCF...AuCCBr | 400.74   | 97.49    | AuCCBr...NCH | 2.65     |
| FCCF...AuCCl  | 392.25   | 97.2     | AuCCl...NCH  | 4.87     |
| FCCF...LiCCCl | 10.50    | ---      | LiCCCl...NCH | 0.65     |
| FCCF...LiCCBr | 10.66    | ---      | LiCCBr...NCH | 1.77     |
| FCCF...LiCCl  | 10.72    | ---      | LiCCl...NCH  | 3.33     |

Note:  $E^2(1)$ ,  $E^2(2)$ , and  $E^2(3)$  correspond to the orbital interactions of  $\pi_{C=C} \rightarrow \sigma^*_{C-M}$  (for Au and Li systems it is  $\pi_{C=C} \rightarrow Lp^*_M$ ),  $Lp_M \rightarrow \pi^*_{C=C}$ , and  $Lp_N \rightarrow \sigma^*_{C-X}$ , respectively.

Table S2 Energy components and interaction energy (kcal/mol) in the dyads at the MP2/aug-cc-pVTZ level

|               | ES     | EX      | REP    | POL     | DISP   | INT    |
|---------------|--------|---------|--------|---------|--------|--------|
| FCCF...CuCCCl | -75.08 | -123.72 | 249.04 | -65.96  | -43.40 | -59.12 |
| FCCF...CuCCBr | -75.20 | -123.95 | 249.62 | -66.02  | -43.45 | -59.00 |
| FCCF...CuCCI  | -75.17 | -123.97 | 249.71 | -66.02  | -43.44 | -58.89 |
| FCCF...AgCCCl | -67.96 | -124.96 | 247.47 | -57.45  | -27.88 | -30.78 |
| FCCF...AgCCBr | -67.86 | -124.80 | 247.21 | -57.35  | -27.89 | -30.69 |
| FCCF...AgCCI  | -67.75 | -124.89 | 246.89 | -57.25  | -27.87 | -30.87 |
| FCCF...AuCCCl | -80.27 | -167.66 | 332.96 | -115.78 | -25.57 | -56.32 |
| FCCF...AuCCBr | -80.07 | -167.26 | 332.24 | -115.42 | -25.58 | -56.09 |
| FCCF...AuCCI  | -79.91 | -167.07 | 331.87 | -115.23 | -25.50 | -55.84 |
| FCCF...LiCCCl | -1.80  | -1.86   | 5.03   | -4.22   | -0.43  | -3.28  |
| FCCF...LiCCBr | -1.82  | -1.89   | 5.13   | -4.29   | -0.43  | -3.30  |
| FCCF...LiCCI  | -1.82  | -1.90   | 5.15   | -4.32   | -0.44  | -3.33  |
| CuCCCl...NCH  | -0.82  | -3.27   | 5.52   | -0.53   | -2.02  | -1.12  |
| CuCCBr...NCH  | -2.24  | -5.69   | 9.71   | -0.97   | -2.66  | -1.85  |
| CuCCI...NCH   | -4.45  | -9.39   | 16.11  | -1.86   | -3.27  | -2.86  |
| AgCCCl...NCH  | -0.68  | -3.22   | 5.42   | -0.52   | -1.97  | -0.97  |
| AgCCBr...NCH  | -2.07  | -5.61   | 9.55   | -0.95   | -2.61  | -1.69  |
| AgCCI...NCH   | -4.30  | -9.37   | 16.06  | -1.84   | -3.22  | -2.67  |
| AuCCCl...NCH  | -1.42  | -3.74   | 6.37   | -0.63   | -2.20  | -1.62  |
| AuCCBr...NCH  | -3.00  | -6.42   | 11.06  | -1.14   | -2.90  | -2.40  |
| AuCCI...NCH   | -5.42  | -10.49  | 18.16  | -2.20   | -3.56  | -3.51  |
| LiCCCl...NCH  | 0.00   | -2.45   | 4.07   | -0.42   | -1.45  | -0.25  |
| LiCCBr...NCH  | -1.21  | -4.59   | 7.70   | -0.75   | -2.01  | -0.86  |
| LiCCI...NCH   | -3.14  | -7.75   | 13.11  | -1.45   | -2.50  | -1.73  |

Table S3 Changes of equilibrium distances ( $\Delta R$ , Å) and electron densities ( $\Delta\rho$ , au) at the intermolecular BCPs in the triads relative to the dyads<sup>a</sup>

| complexes                         | $\Delta R_{M\cdots\pi}$ | $\Delta R_{X\cdots N}$ | $\Delta\rho_{M\cdots\pi}$ | $\Delta\rho_{X\cdots N}$ |
|-----------------------------------|-------------------------|------------------------|---------------------------|--------------------------|
| FCCF $\cdots$ CuCCCl $\cdots$ NCH | 0.0014                  | -0.0293                | -0.0004                   | 0.0005                   |
| FCCF $\cdots$ CuCCBr $\cdots$ NCH | 0.0015                  | -0.0246                | -0.0004                   | 0.0006                   |
| FCCF $\cdots$ CuCCI $\cdots$ NCH  | 0.0018                  | -0.0241                | -0.0005                   | 0.0007                   |
| FCCF $\cdots$ AgCCCl $\cdots$ NCH | -0.0046                 | -0.0169                | 0.0008                    | 0.0003                   |
| FCCF $\cdots$ AgCCBr $\cdots$ NCH | -0.0045                 | -0.0123                | 0.0008                    | 0.0003                   |
| FCCF $\cdots$ AgCCI $\cdots$ NCH  | -0.0046                 | -0.0092                | 0.0008                    | 0.0003                   |
| FCCF $\cdots$ AuCCCl $\cdots$ NCH | 0.0000                  | -0.0016                | -0.0001                   | 0.0001                   |
| FCCF $\cdots$ AuCCBr $\cdots$ NCH | -0.0004                 | 0.0052                 | 0.0001                    | -0.0001                  |
| FCCF $\cdots$ AuCCI $\cdots$ NCH  | -0.0002                 | 0.0107                 | 0.0000                    | -0.0003                  |
| FCCF $\cdots$ LiCCCl $\cdots$ NCH | 0.0028                  | 0.0095                 | 0.0000                    | -0.0001                  |
| FCCF $\cdots$ LiCCBr $\cdots$ NCH | 0.0034                  | 0.0122                 | -0.0001                   | -0.0002                  |
| FCCF $\cdots$ LiCCI $\cdots$ NCH  | 0.0027                  | 0.0062                 | -0.0001                   | -0.0001                  |

<sup>a</sup> BCPs correspond to the M $\cdots$ C in the coinage-metal- $\pi$  interaction, the Li $\cdots$  $\pi$  in the lithium bond, and the X $\cdots$ N in the halogen bond.

Table S4 The most positive MEP on the halogen atom ( $V_{X,\max}$ , a.u.) in the dyad FCCF $\cdots$ MCCX and on the metal atom ( $V_{M,\max}$ , a.u.) in the dyad MCCX $\cdots$ NCH as well as their changes ( $\Delta V$ , a.u.) relative to the molecules.

|                      | $V_{X,\max}$ | $\Delta V_{X,\max}$ |                     | $V_{M,\max}$ | $\Delta V_{M,\max}$ |
|----------------------|--------------|---------------------|---------------------|--------------|---------------------|
| FCCF $\cdots$ CuCCCl | 0.0249       | 0.0081              | CuCCCl $\cdots$ NCH | 0.1664       | -0.0064             |
| FCCF $\cdots$ CuCCBr | 0.0327       | 0.0076              | CuCCBr $\cdots$ NCH | 0.1663       | -0.0069             |
| FCCF $\cdots$ CuCCl  | 0.0440       | 0.0073              | CuCCl $\cdots$ NCH  | 0.1655       | -0.0077             |
| FCCF $\cdots$ AgCCCl | 0.0179       | 0.0034              | AgCCCl $\cdots$ NCH | 0.1221       | -0.0058             |
| FCCF $\cdots$ AgCCBr | 0.0260       | 0.0031              | AgCCBr $\cdots$ NCH | 0.1221       | -0.0064             |
| FCCF $\cdots$ AgCCl  | 0.0372       | 0.0029              | AgCCl $\cdots$ NCH  | 0.1222       | -0.0064             |
| FCCF $\cdots$ AuCCCl | 0.0268       | 0.0011              | AuCCCl $\cdots$ NCH | 0.1443       | -0.0078             |
| FCCF $\cdots$ AuCCBr | 0.0348       | 0.0007              | AuCCBr $\cdots$ NCH | 0.1431       | -0.0088             |
| FCCF $\cdots$ AuCCl  | 0.0460       | 0.0002              | AuCCl $\cdots$ NCH  | 0.1402       | -0.0106             |
| FCCF $\cdots$ LiCCCl | -0.0013      | -0.0023             | LiCCCl $\cdots$ NCH | 0.3123       | -0.0067             |
| FCCF $\cdots$ LiCCBr | 0.0249       | 0.0081              | LiCCBr $\cdots$ NCH | 0.1664       | -0.0066             |
| FCCF $\cdots$ LiCCl  | 0.0327       | 0.0076              | LiCCl $\cdots$ NCH  | 0.1663       | -0.0068             |

Table S5 Second-order perturbation energy ( $E^2$ , kcal/mol) of  $Lp_N \rightarrow \sigma^*_{C-X}$  orbital interaction in the triads and its change ( $\Delta E^2$ , kcal/mol) compared with dyads at the HF/aug-cc-pVTZ(PP) level.

| complexes           | $E^2$ | $\Delta E^2$ |
|---------------------|-------|--------------|
| FCCF...CuCCCl...NCH | 1.03  | 0.11         |
| FCCF...CuCCBr...NCH | 2.49  | 0.21         |
| FCCF...CuCCl...NCH  | 4.65  | 0.51         |
| FCCF...AgCCCl...NCH | 0.95  | 0.05         |
| FCCF...AgCCBr...NCH | 2.32  | 0.10         |
| FCCF...AgCCl...NCH  | 4.20  | 0.06         |
| FCCF...AuCCCl...NCH | 1.10  | 0.00         |
| FCCF...AuCCBr...NCH | 2.61  | -0.04        |
| FCCF...AuCCl...NCH  | 4.62  | -0.25        |
| FCCF...LiCCCl...NCH | 0.62  | -0.03        |
| FCCF...LiCCBr...NCH | 1.69  | -0.08        |
| FCCF...LiCCl...NCH  | 3.20  | -0.13        |

Table S6 Binding distance ( $R$ , Å) and interaction energy ( $\Delta E$ , kcal/mol) in the dyads.

| dyads                 | $\Delta E$     | $R$   | dyads                | $\Delta E$     | $R$   |
|-----------------------|----------------|-------|----------------------|----------------|-------|
| HCCH $\cdots$ CuCCCl  | -45.16(-52.10) | 1.791 | FCCF $\cdots$ CuCCCl | -47.51(-61.71) | 1.786 |
| HCCH $\cdots$ CuCCBr  | -45.02(-51.96) | 1.790 | FCCF $\cdots$ CuCCBr | -47.35(-61.56) | 1.786 |
| HCCH $\cdots$ CuCCl   | -44.88(-51.74) | 1.792 | FCCF $\cdots$ CuCCl  | -47.21(-61.46) | 1.785 |
| HCCH $\cdots$ AgCCCl  | -29.60(-31.93) | 2.082 | FCCF $\cdots$ AgCCCl | -25.15(-34.83) | 2.001 |
| HCCH $\cdots$ AgCCBr  | -29.58(-31.91) | 2.083 | FCCF $\cdots$ AgCCBr | -25.15(-34.71) | 2.002 |
| HCCH $\cdots$ AgCCl   | -29.53(-31.84) | 2.084 | FCCF $\cdots$ AgCCl  | -24.99(-34.61) | 2.002 |
| HCCH $\cdots$ AuCCCl  | -44.32(-49.59) | 2.014 | FCCF $\cdots$ AuCCCl | -45.64(-59.47) | 1.962 |
| HCCH $\cdots$ AuCCBr  | -44.16(-49.41) | 2.015 | FCCF $\cdots$ AuCCBr | -45.44(-59.21) | 1.962 |
| HCCH $\cdots$ AuCCl   | -43.88(-49.10) | 2.016 | FCCF $\cdots$ AuCCl  | -45.14(-58.93) | 1.963 |
| HCCH $\cdots$ LiCCCl  | -9.25          | 2.346 | FCCF $\cdots$ LiCCCl | -3.14          | 2.492 |
| HCCH $\cdots$ LiCCBr  | -9.30          | 2.342 | FCCF $\cdots$ LiCCBr | -3.17          | 2.486 |
| HCCH $\cdots$ LiCCl   | -9.35          | 2.340 | FCCF $\cdots$ LiCCl  | -3.20          | 2.485 |
| NCCCCN $\cdots$ CuCCl | -38.43(-47.49) | 1.792 | ---                  | ---            | ---   |
| NCCCCN $\cdots$ AgCCl | -19.45(-24.05) | 2.033 | ---                  | ---            | ---   |
| NCCCCN $\cdots$ AuCCl | -36.48(-44.52) | 1.990 | ---                  | ---            | ---   |
| NCCCCN $\cdots$ LiCCl | 2.53(2.39)     | 2.711 | ---                  | ---            | ---   |

Note:  $R$  is the distance between the central point of  $C\equiv C$  and the  $M$  in the metal- $\pi$  interaction. Data in parentheses are the interaction energies obtained with the geometries of monomers frozen in the complexes for HCCH, FCCF, and NCCCCN.

Table S7 The angle of  $C\equiv C-Y$  ( $\alpha$ , °) in the dyads and corresponding triads (in parantheses).

| dyads          | $\alpha$ | dyads         | $\alpha$ |
|----------------|----------|---------------|----------|
| HCCH...CuCCCl  | 161(161) | FCCF...CuCCCl | 158(158) |
| HCCH...CuCCBr  | 161(161) | FCCF...CuCCBr | 158(158) |
| HCCH...CuCCI   | 161(161) | FCCF...CuCCI  | 158(158) |
| HCCH...AgCCCl  | 169(169) | FCCF...AgCCCl | 162(161) |
| HCCH...AgCCBr  | 169(169) | FCCF...AgCCBr | 162(161) |
| HCCH...AgCCI   | 169(169) | FCCF...AgCCI  | 162(161) |
| HCCH...AuCCCl  | 164(163) | FCCF...AuCCCl | 158(158) |
| HCCH...AuCCBr  | 164(163) | FCCF...AuCCBr | 158(158) |
| HCCH...AuCCI   | 164(163) | FCCF...AuCCI  | 158(158) |
| HCCH...LiCCCl  | 178(179) | FCCF...LiCCCl | 178(178) |
| HCCH...LiCCBr  | 178(179) | FCCF...LiCCBr | 178(178) |
| HCCH...LiCCI   | 178(179) | FCCF...LiCCI  | 178(178) |
| NCCCCN...CuCCI | 159(159) | ---           | ---      |
| NCCCCN...AgCCI | 165(164) | ---           | ---      |
| NCCCCN...AuCCI | 160(160) | ---           | ---      |
| NCCCCN...LiCCI | 179(179) | ---           | ---      |

Fig. S1 The relationship between second-order perturbation energy ( $E^2$ , kcal/mol) and interaction energy ( $\Delta E$ , kcal/mol) for each type of MCCX $\cdots$ NCH interaction with the same metal. M in a-d is Cu, Ag, Au, and Li, respectively.

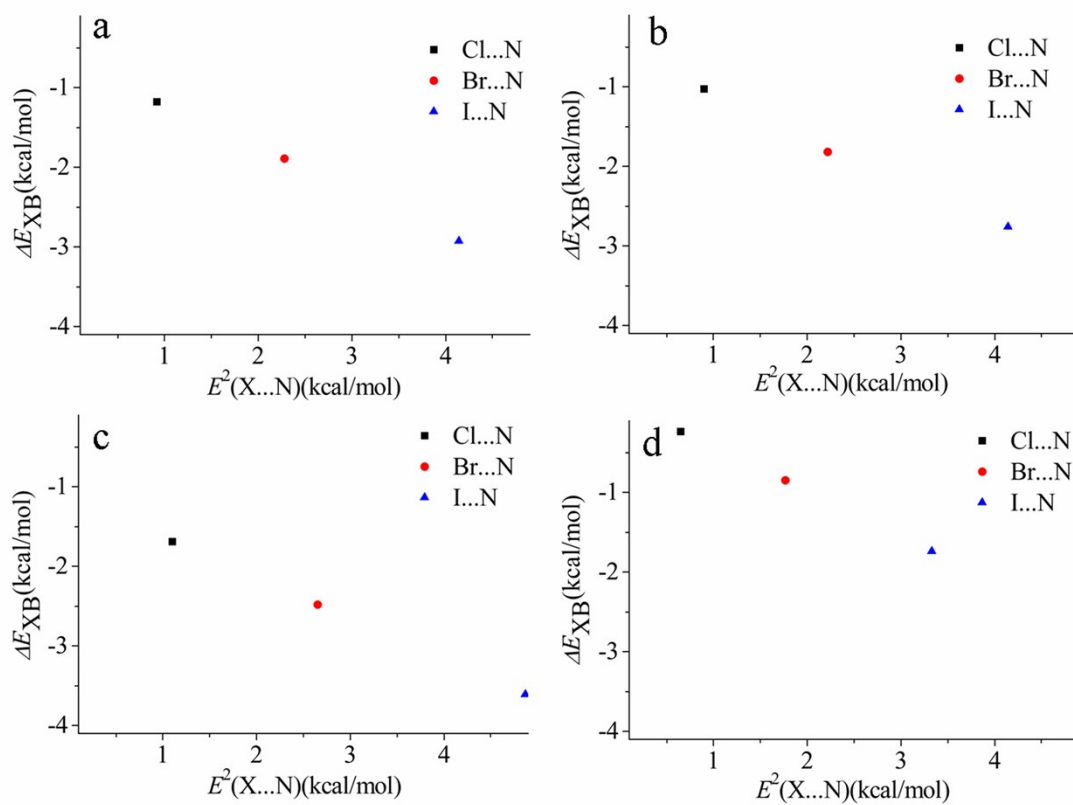



Fig. S2 Electron density difference maps of some dyads and triads. The red lines represent the concentration of charge density and the blue ones are the regions with reduced charge density.

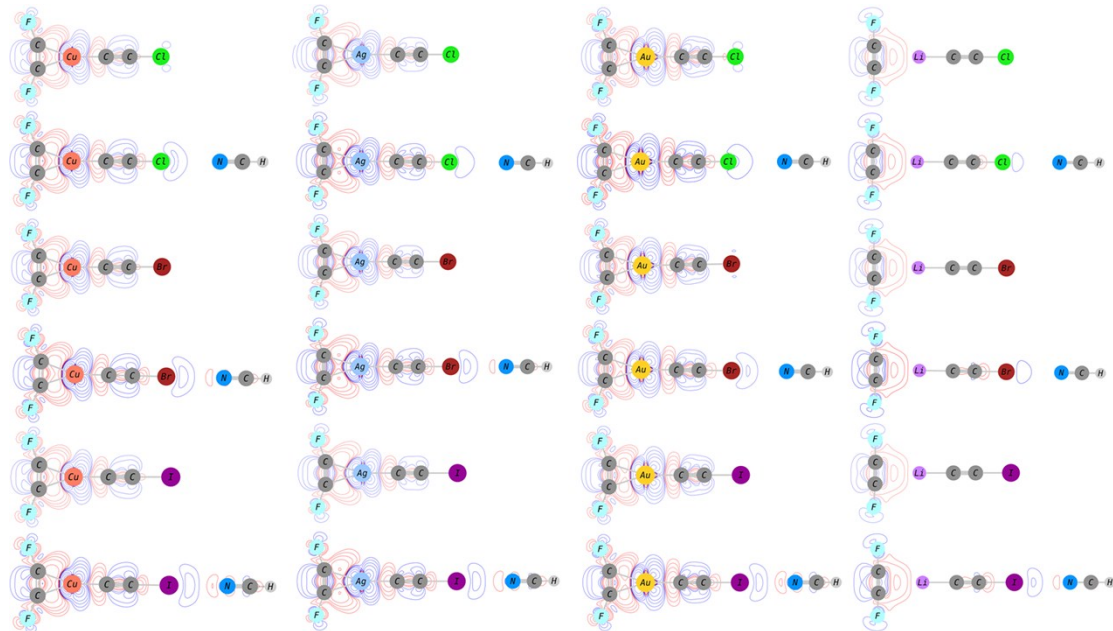

Supplement: c5ra22968e1.pdf [file c5ra22968e1.pdf]
